# Supplementary material
Source: publisher figshare collection journal article supplement (https://acs.figshare.com/ndownloader/files/3940708)
Supplement: Supplementary file 1 [file 3940708]

# SUPPORTING INFORMATION

## How the Second-Order Nonlinear Optical Response of the Collagen Triple Helix Appears: A Theoretical Investigation

Marc de Wergifosse,<sup>\$</sup> Jérôme de Ruyck,<sup>£</sup> and Benoît Champagne<sup>\*,§</sup>

<sup>\$</sup> *Laboratoire de Chimie Théorique, Unité de Chimie Physique Théorique et Structurale, Université de Namur, rue de Bruxelles, 61, B-5000 Namur, Belgium.*

<sup>£</sup> *Laboratoire de Chimie Biologique Structurale, Unité de Chimie Physique Théorique et Structurale, Université de Namur, rue de Bruxelles, 61, B-5000 Namur, Belgium.*

<sup>\*</sup> [benoit.champagne@unamur.be](mailto:benoit.champagne@unamur.be), phone: +32 (0)81 72 45 54.

The simplest way to estimate the impact of frequency dispersion in pseudo-dipolar chromophores is to consider the two-state approximation (TSA), which assumes that only one excited state contributes to the second-order NLO response. Considering a homogeneous damping  $\gamma$  and neglecting the non-resonant terms, the frequency-dispersion factor of the diagonal component of the first hyperpolarizability tensor,  $F(\omega, \omega_{ge}, \gamma)$ , reads:

$$F(\omega, \omega_{ge}, \gamma) = \frac{\beta_{ZZZ}(-2\omega, \omega, \omega)}{\beta_{ZZZ}(0, 0, 0)} = \frac{\omega_{ge}^2 (\omega_{ge} - i\gamma)^2}{\left([\omega_{ge} - i\gamma]^2 - 4\omega^2\right) \left([\omega_{ge} - i\gamma]^2 - \omega^2\right)}$$

where  $g$  and  $e$  are the two electronic, ground and excited, states contributing to the first hyperpolarizability, and  $\hbar\omega_{ge}$  is the corresponding excitation energy. The two-state approximation can be improved by incorporating an inhomogeneous broadening based on the absorption spectrum, which implicitly contains information on the distribution of the transition frequencies as well as by taking into account the vibronic structure of the excited states. According to Campo *et al.*<sup>35</sup> for an incoherent process like HRS, the dispersion factor reads:

$$\left| \frac{\beta^{HRS}(-2\omega; \omega, \omega)}{\beta^{HRS}(0; 0, 0)} \right| = \left\{ \int N(\omega'_{ge}) \left| F(\omega, \omega'_{ge}, \gamma) \right|^2 d\omega'_{ge} \right\}^{1/2}$$

where  $N(\omega'_{ge})$ , the distribution of the transition frequencies is a single-mode vibronic model:

$$N(\omega'_{ge}) = \sum_n^{vib. levels} \left[ \frac{S^n e^{-S}}{n!} \right] e^{-[(\omega'_{ge} - \omega_n)/\gamma_{vib}]^2}$$

where  $\omega_n = \omega_{ge} + n \omega_{vib}$  corresponds to the transition from the ground state to the  $n^{\text{th}}$  vibrational level of the excited state. The Huang-Rhys factors ( $S$ ) were chosen to reproduce the shape of the absorption band. Values of  $\omega_{vib}$  and  $\gamma_{vib}$  were also chosen such to reproduce the absorption spectra as accurately as possible.

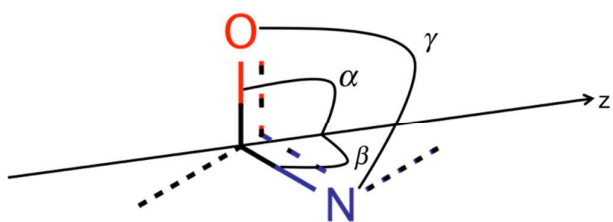

**Figure S1:** Representation of representative angles of each amide groups with respect to the z-axis.

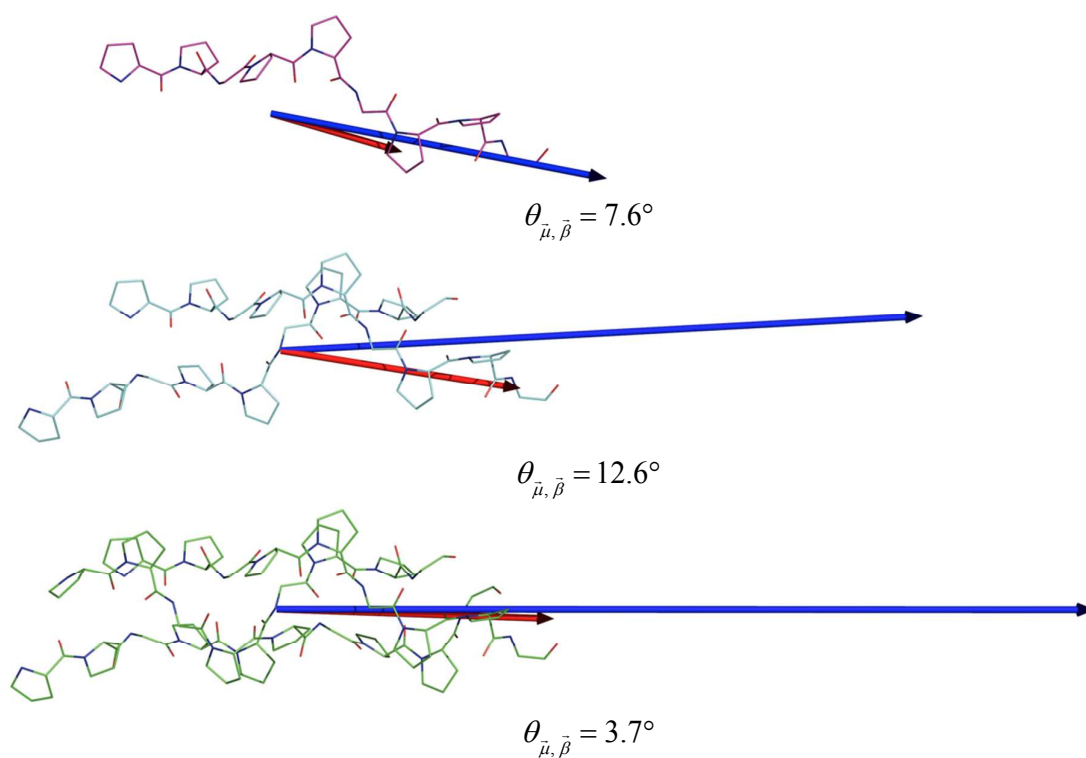

**Figure S2:**  $\beta$  (blue) and  $\mu$  (red) vectors for one, two, and three helices of PPG3. These vectors have been determined at the CPHF level of calculation. The lengths of the  $\mu$  and  $\beta$  vectors are proportional to their norms and are consistent for the three systems.

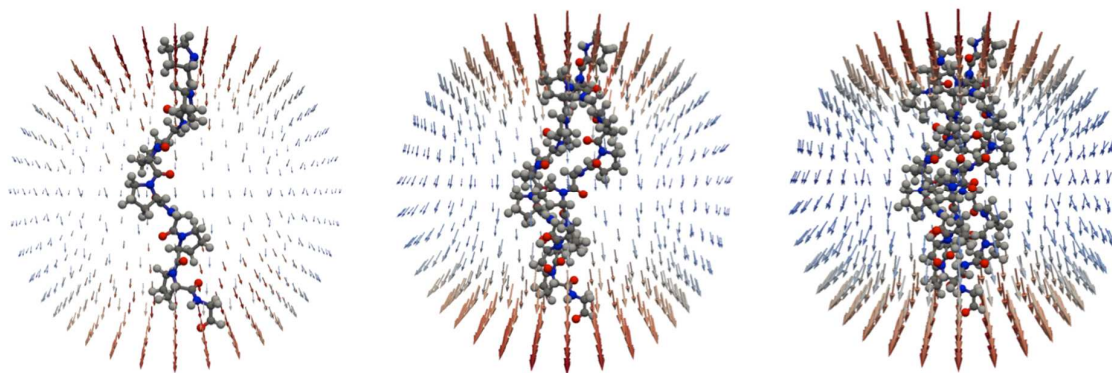

**Figure S3:** Unit sphere representations of the first hyperpolarizability tensor of PPG1 (left), PPG2 (middle), and PPG3 (right) obtained at the CPHF/6-31+G(d) level in vacuo.

**Table S1:  $\beta_{\text{HRS}}$  of Pro-Pro-Gly calculated at the TDHF/CPHF level of theory with different basis sets (in a.u.).**

| <i>in vacuo</i>                    | 6-31+G(d) | aug-cc-pVDZ | aug-cc-pVTZ |
|------------------------------------|-----------|-------------|-------------|
| $\beta_{\text{HRS},\infty}$        | 54        | 58          | 56          |
| $\beta_{\text{HRS},1900\text{nm}}$ | 55        | 59          | 58          |
| $\beta_{\text{HRS},1064\text{nm}}$ | 58        | 62          | 61          |

**Table S2: Representative angles (in °) that each amide group of PPG3 forms with the z-axis. The description of the angles can be found in figure S1.**

|                             | $\alpha$ | $\beta$ | $\gamma$ | $\alpha + \beta$ |
|-----------------------------|----------|---------|----------|------------------|
| <b>1<sup>st</sup> chain</b> |          |         |          |                  |
| Pro1-Pro2                   | 109      | 19      | 123      | 128              |
| Pro2-Gly3                   | 102      | 56      | 124      | 158              |
| Gly3-Pro4                   | 63       | 62      | 120      | 125              |
| Pro4-Pro5                   | 94       | 34      | 121      | 128              |
| Pro5-Gly6                   | 103      | 60      | 124      | 163              |
| Gly6-Pro7                   | 56       | 69      | 121      | 125              |
| Pro7-Pro8                   | 95       | 29      | 121      | 124              |
| Pro8-Gly9                   | 106      | 59      | 125      | 165              |
| <b>2<sup>nd</sup> chain</b> |          |         |          |                  |
| Pro1-Pro2                   | 84       | 39      | 122      | 123              |
| Pro2-Gly3                   | 112      | 49      | 124      | 161              |
| Gly3-Pro4                   | 67       | 61      | 121      | 128              |
| Pro4-Pro5                   | 93       | 35      | 121      | 128              |
| Pro5-Gly6                   | 103      | 53      | 124      | 156              |
| Gly6-Pro7                   | 65       | 64      | 121      | 129              |
| Pro7-Pro8                   | 89       | 39      | 121      | 128              |
| Pro8-Gly9                   | 82       | 73      | 125      | 155              |
| <b>3<sup>rd</sup> chain</b> |          |         |          |                  |
| Pro1-Pro2                   | 85       | 38      | 122      | 123              |
| Pro2-Gly3                   | 112      | 49      | 124      | 161              |
| Gly3-Pro4                   | 65       | 69      | 121      | 134              |
| Pro4-Pro5                   | 87       | 38      | 121      | 125              |
| Pro5-Gly6                   | 114      | 47      | 124      | 161              |
| Gly6-Pro7                   | 64       | 63      | 121      | 127              |
| Pro7-Pro8                   | 95       | 30      | 120      | 125              |
| Pro8-Gly9                   | 118      | 44      | 124      | 162              |

**Table S3: Representative angles (in °) that each amide group of GGG3 forms with the z-axis. The description of the angles can be found in figure S1.**

| GGG3                        | $\alpha$ | $\beta$ | $\gamma$ | $\alpha + \beta$ |
|-----------------------------|----------|---------|----------|------------------|
| <b>1<sup>st</sup> chain</b> |          |         |          |                  |
| Gly1-Gly2                   | 65       | 63      | 126      | 128              |
| Gly2-Gly3                   | 113      | 14      | 125      | 127              |
| Gly3-Gly4                   | 92       | 32      | 124      | 124              |
| Gly4-Gly5                   | 97       | 47      | 123      | 144              |
| Gly5-Gly6                   | 106      | 47      | 124      | 153              |
| Gly6-Gly7                   | 81       | 47      | 122      | 128              |
| Gly7-Gly8                   | 91       | 51      | 123      | 142              |
| Gly8-Gly9                   | 67       | 76      | 124      | 143              |
| <b>2<sup>nd</sup> chain</b> |          |         |          |                  |
| Gly1-Gly2                   | 41       | 90      | 126      | 131              |
| Gly2-Gly3                   | 121      | 12      | 124      | 133              |
| Gly3-Gly4                   | 104      | 29      | 124      | 133              |
| Gly4-Gly5                   | 92       | 33      | 123      | 125              |
| Gly5-Gly6                   | 103      | 51      | 124      | 154              |
| Gly6-Gly7                   | 78       | 57      | 122      | 135              |
| Gly7-Gly8                   | 81       | 42      | 122      | 123              |
| Gly8-Gly9                   | 132      | 39      | 125      | 171              |
| <b>3<sup>rd</sup> chain</b> |          |         |          |                  |
| Gly1-Gly2                   | 42       | 83      | 126      | 125              |
| Gly2-Gly3                   | 131      | -12     | 123      | 143              |
| Gly3-Gly4                   | 70       | 57      | 124      | 127              |
| Gly4-Gly5                   | 97       | 32      | 123      | 129              |
| Gly5-Gly6                   | 104      | 49      | 125      | 153              |
| Gly6-Gly7                   | 70       | 53      | 123      | 123              |
| Gly7-Gly8                   | 64       | 94      | 124      | 158              |
| Gly8-Gly9                   | 102      | 61      | 124      | 163              |

**Table S4: frequency-dispersion of the HRS first hyperpolarizabilities (and depolarization ratios) of [(Pro-Pro-Gly)<sub>10</sub>]<sub>3</sub> calculated at different levels of theory (in a.u.).**

|                                    | ONIOM                    |                          | ONIOM                         |                          |
|------------------------------------|--------------------------|--------------------------|-------------------------------|--------------------------|
|                                    | HF/6-31+G(d):HF/6-31G(d) |                          | LC-BLYP/6-31+G(d):HF/6-31G(d) |                          |
|                                    | <i>in vacuo</i>          | <i>in water</i> (IEFPCM) | <i>in vacuo</i>               | <i>in water</i> (IEFPCM) |
| $\beta_{\text{HRS},\infty}$        | 2703 (8.84)              | 4232 (8.12)              | 2785 (8.85)                   | 4480 (8.08)              |
| $\beta_{\text{HRS},1900\text{nm}}$ | 2816 (8.86)              | 3483 (9.85)              | 2937 (8.88)                   | 3521 (9.90)              |
| $\beta_{\text{HRS},1064\text{nm}}$ | 3091 (8.91)              | 3763 (9.11)              | 3321 (8.92)                   | 4140 (9.10)              |
| $\beta_{\text{HRS},790\text{nm}}$  | 3472 (8.99)              | 4230 (9.24)              | 3881 (8.95)                   | 4558 (9.28)              |
| $\beta_{\text{HRS},694\text{nm}}$  | 3765 (9.04)              | 4861 (9.17)              | 4333 (8.96)                   | 5643 (9.17)              |
